# Supplementary material
Source: PubMed Central journal article supplement (PMC5470626)
Supplement: NIHMS863219-supplement-1.pdf [file NIHMS863219-supplement-1.pdf]

scale bar of 15  $\mu\text{m}$ . **(B)** Quantification of the extent of polarized cells observed in response to fMLP or LTB<sub>4</sub>; each bar represents a minimum of 300 cells. **(C)** Cell tracks of vehicle or Ent-treated PMNs chemotaxis towards fMLP or LTB<sub>4</sub>; the X and Y axes represent distance in  $\mu\text{m}$ . **(D)** Total distance migrated and **(E)** the directionality of migration exhibited by vehicle or Ent pre-treated PMNs in response to fMLP (100 nM) or LTB<sub>4</sub> (250 nM); each bar represents 60 cells. *In vitro* assays were performed in triplicates and are representative of two independent experiments. Results are expressed as mean  $\pm$  SEM.
